# Supplementary material for: Positive Changes Experienced After a First Episode of Psychosis: A Systematic Review
Source: Atypon-hosted journal article supplement (doi:10.1176/appi.ps.201600586), 2017-11-01
Supplement: appi.ps.201600586.ds001.pdf [file appi.ps.201600586.ds001.pdf]

Table 1: Keywords and Search Terms Applied

**Keywords**

1. (first adj3 psychos\*).mp.
2. (first adj3 psychotic).mp.
3. (early adj3 psychos\*).mp.
4. (early adj3 psychotic).mp.
5. (initial adj3 psychos\*).mp.
6. (initial adj3 psychotic).mp.
7. or/1-6
8. Resilience, Psychological/
9. "Power (Psychology)"/
10. exp social environment/
11. exp Attitude to Health/
12. exp Family/
13. Mental Health/
14. exp Adaptation, Psychological/
15. quality of life/
16. morale/
17. life change events/
18. resilien\*.mp.
19. strong\*.mp.
20. robust\*.mp.
21. resistant.mp.
22. spirit\*.mp.
23. tough.mp.
24. endure\*.mp.
25. empower\*.mp.
26. enabling.mp.
27. embolden\*.mp.
28. encouragement.mp.
29. inspiration.mp.
30. inspire.mp.
31. courage\*.mp.
32. morale.mp.
33. strength.mp.
34. happy.mp.
35. happiness.mp.
36. pleasant\*.mp.
37. enjoy\*.mp.
38. satisf\*.mp.
39. pleasur\*.mp.
40. pleasing.mp.
41. comfort\*.mp.
42. reassuran\*.mp.
43. well being.mp.

44. wellbeing.mp.
45. content\*.mp.
46. hearten\*.mp.
47. benefi\*.mp.
48. useful.mp.
49. value.mp.
50. valuable.mp.
51. helpful.mp.
52. favorable.mp.
53. favourable.mp.
54. advantag\*.mp.
55. constructive.mp.
56. benevolen\*.mp.
57. caring.mp.
58. meaning.mp.
59. significan\*.mp.
60. importan\*.mp.
61. consequen\*.mp.
62. adjust\*.mp.
63. adapt\*.mp.
64. open to experience.mp.
65. quality of life.mp.
66. qol.mp.
67. life chang\*.mp.
68. life experienc\*.mp.
69. (positive and (product or adjustment or adaptation or psychology)).mp.
70. recovery.mp.
71. empath\*.mp.
72. neutral.mp.
73. harmless.mp.
74. awareness.mp.
75. greatness.mp.
76. self actuali\*.mp.
77. promotion.mp.
78. creativ\*.mp.
79. madness.mp.
80. pride.mp.
81. proud.mp.
82. holistic\*.mp.
83. ((posttraumatic or stress) and growth).mp.
84. thriv\*.mp.
85. blessing\*.mp.
86. transformation\*.mp.
87. or/8-86
88. 7 and 87
89. (surviv\* or recover\*).mp.
90. 7 and 89

91. exp empirical research/ or exp health services administration/
92. (qualitative or empirical or grounded or ethno\* or naturalistic or phenomenologic\* or interview\* or experience\* or theme\*).mp.
93. 7 and 92
94. 90 or 93
95. 94 not 88

**Additional Keywords**

"First episode psychosis" OR "early psychosis" OR "early psychotic" OR "qualitative" OR "phenomenology" OR "discourse analysis" OR "ethnograph" OR "narrative" OR "narratives" OR "lived experience" OR "lived experiences" OR "in-depth interview" OR "in-depth interviews" OR "grounded theory" OR "focus group" OR "lived experience" OR "open-ended" OR "thematic analyses" OR "themes" OR "theme" OR "purposive sample" OR "purposive sampling" OR "content analysis" Post traumatic growth" OR "thrive" OR "thriving" OR "benefit" OR "benefits" OR "recover" OR "recovering" OR "recovery" OR "survive" OR "surviving" OR "integration" OR "sealing over" OR "recovery style questionnaire"

Table 2: Flow Chart of Included Studies

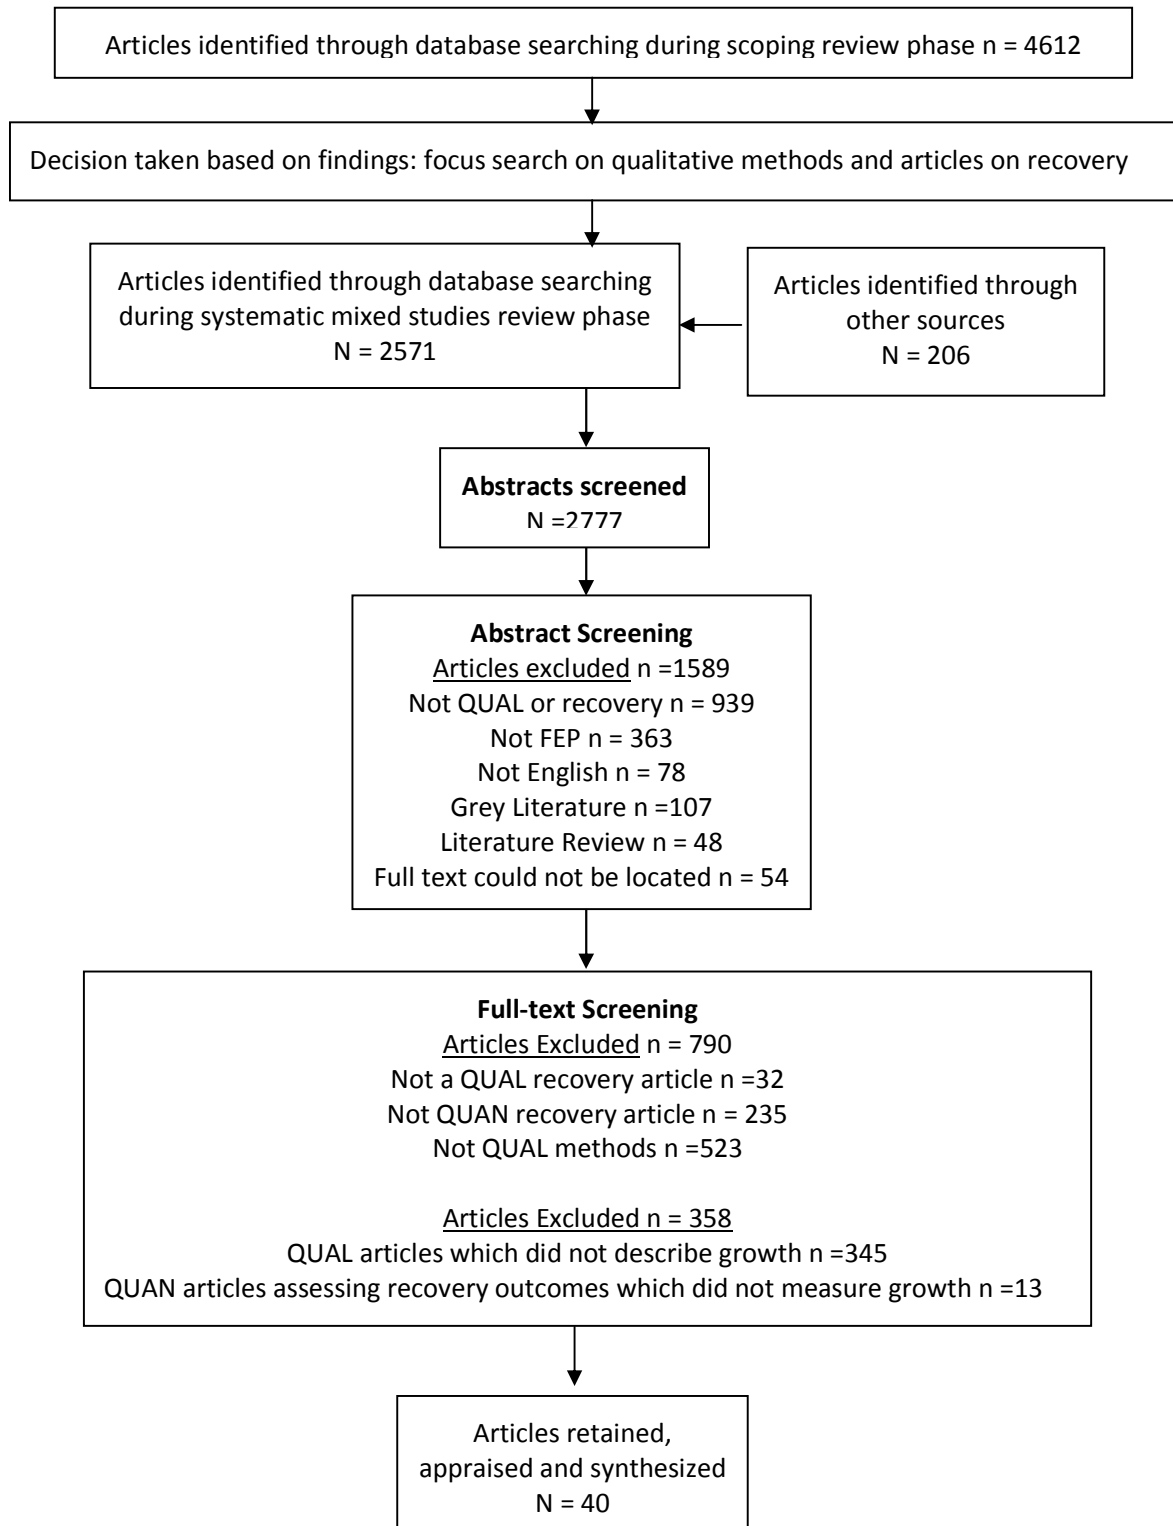

Scoping Review

Identification

Screening

Screening

Screening

Eligibility

Included
